# Supplementary material for: Competitive Foods’ Nutritional Quality and Compliance with Smart Snacks Standards: An Analysis of a National Sample of U.S. Middle and High Schools
Source: MDPI journal article supplement (doi:10.3390/nu16020275), 2024-01-17
Supplement: s1 [file s1]

**Supplemental Figure 1. States included in competitive food study by United States Department of Agriculture's Food and Nutrition Service Administrative Regions**

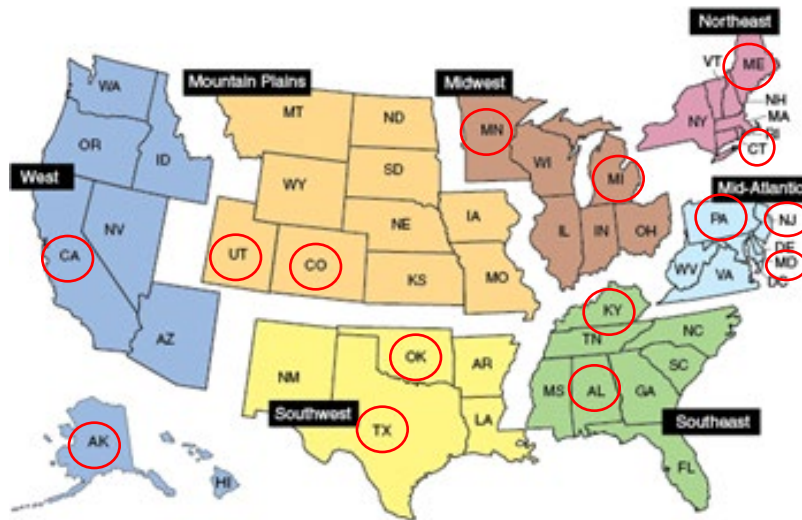

**Supplemental Table 1. Percent compliance with each component of the Smart Snacks standards among n=840 unique competitive foods observed in a national sample of middle and high schools<sup>1</sup>**

| Category                                          | Overall Smart Snacks compliance (%) | Calories (≤200 kcal) | Percent of calories from total fat (≤35%) | Percent of calories from saturated fat (<10%) | Trans fat (0g) | Sodium (≤200 mg) | Total sugar (≤ 35% by weight) | Other <sup>2</sup> |
|---------------------------------------------------|-------------------------------------|----------------------|-------------------------------------------|-----------------------------------------------|----------------|------------------|-------------------------------|--------------------|
| <b>Beverages (n=369)</b>                          |                                     |                      |                                           |                                               |                |                  |                               |                    |
| Water: unflavored (n=22)                          | 100%                                | N/A                  | N/A                                       | N/A                                           | N/A            | N/A              | N/A                           | N/A                |
| Water: flavored (n=117)                           | 100%*                               | N/A                  | N/A                                       | N/A                                           | N/A            | N/A              | N/A                           | N/A                |
| Milk products <sup>3</sup> (n=11)                 | 82%                                 | N/A                  | N/A                                       | N/A                                           | N/A            | N/A              | N/A                           | N/A                |
| 100% fruit juice <sup>4</sup> (n=33)              | 94%                                 | N/A                  | N/A                                       | N/A                                           | N/A            | N/A              | N/A                           | N/A                |
| Low and no-calorie beverages <sup>5</sup> (n=186) | 41%*                                | N/A                  | N/A                                       | N/A                                           | N/A            | N/A              | N/A                           | N/A                |
| <b>Snacks (n=471)</b>                             |                                     |                      |                                           |                                               |                |                  |                               |                    |
| Salty snacks (n=149)                              | 41%                                 | 75%                  | 99%                                       | 81%                                           | 100%           | 63%              | 99%                           | 41%                |
| Sweet snacks (n=208)                              | 43%                                 | 69%                  | 99%                                       | 72%                                           | 100%           | 80%              | 68%                           | 43%                |
| Ice cream and frozen treats (n=100)               | 78%                                 | 97%                  | 100%                                      | 78%                                           | 100%           | 99%              | 96%                           | 94%                |
| Yogurt and cheese (n=9)                           | 89%                                 | 89%                  | 100%                                      | 89%                                           | 100%           | 89%              | 89%                           | 100%               |
| Fruits and vegetables <sup>6</sup> (n=5)          | 100%                                | 100%                 | 100%                                      | 100%                                          | 100%           | 100%             | 100%                          | 100%               |

\* Includes products with non-sugar sweeteners (i.e., artificial sweeteners and other sugar substitutes) that are considered compliant only among high schools, but would not be compliant if offered in a middle school.

<sup>1</sup> Among n= 72 middle and high schools in a national sample of schools selling competitive foods.

<sup>2</sup> “Other” includes: (1) a grain product that contains 50 percent or more whole grains by weight (have a whole grain as the first ingredient); (2) a product with the first ingredient being a fruit, a vegetable, a dairy food, or a protein food; or (3) a combination food that contains at least ¼ cup of fruit and/or vegetable

<sup>3</sup> Milk includes unflavored or flavored fat-free milk, low-fat milk, and milk alternatives as permitted by the National School Lunch Program and School Breakfast program. Compliance for milk products is ≤ 12 fluid ounces.

<sup>4</sup> Compliance for 100% fruit juice is ≤ 12 fluid ounces.

<sup>5</sup> Low and no-calorie beverages (high school only) include low calorie drinks with the equivalent of 5 calories per fluid ounce (maximum of 60 kcals/12 fluid ounces) and no-calorie beverages with less than 5 calories per 8 fluid ounces (maximum of 10 calories/20 fluid ounce).

<sup>6</sup> Includes combinations of fruit or vegetables with dips or nut butters (e.g., apples with peanut butter).

**Supplemental Table 2. Average Smart Snacks compliance, nutrients, and artificial sugar and dyes among n=2,824 competitive foods offered in a national sample of middle and high schools with competitive foods<sup>1</sup>**

| Category                           | Smart Snacks compliant (%) | Calories (kcal)*, range | Total fat (g), range | Total fat (%)*, range | Saturated fat (g), range | Saturated fat (%)*, range | Sodium (mg)*, range | Total sugars (g)*, range | Added sugars (g), range | Percent calories from added sugars | Fiber (g), range | Contains non- sugar sweeteners <sup>2*</sup> (%) | Contains synthetic dye(s) <sup>3</sup> (%) |
|------------------------------------|----------------------------|-------------------------|----------------------|-----------------------|--------------------------|---------------------------|---------------------|--------------------------|-------------------------|------------------------------------|------------------|--------------------------------------------------|--------------------------------------------|
| Beverages                          |                            |                         |                      |                       |                          |                           |                     |                          |                         |                                    |                  |                                                  |                                            |
| Middle (n=181)                     | 75%                        | 75 (0-290)              | 0.0 (0-4.5)          | 0.0 (0-6)             | 0.0 (0-0.5)              | 0.0 (0-3)                 | 39 (0-270)          | 16.9 (0-73)              | 2.9 (0-73)              | 15% (0-100%)                       | 0.0 (0-2)        | 12%                                              | 8%                                         |
| High (n=836)                       | 81%                        | 37 (0-290)              | 0.0 (0-4.5)          | 0.0 (0-6)             | 0.0 (0-2.5)              | 0.1 (0-13)                | 79 (0-960)          | 8.1 (0-73)               | 5.1 (0-73)              | 27% (0-100%)                       | 0.0 (0-5)        | 52% <sup>5</sup>                                 | 25%                                        |
| Salty Snacks                       |                            |                         |                      |                       |                          |                           |                     |                          |                         |                                    |                  |                                                  |                                            |
| Middle (n=295)                     | 74%                        | 138 (60-330)            | 5.6 (0.5-29)         | 7.5 (1-45)            | 0.8 (0-4)                | 4.3 (0-21)                | 201 (65-900)        | 1.5 (0-16)               | 1.0 (0-16)              | 2.9% (0-29%)                       | 1.6 (0-12)       | 0%                                               | 32%                                        |
| High (n=610)                       | 70%                        | 140 (60-450)            | 5.8 (1-29)           | 7.7 (1-45)            | 0.9 (0-9)                | 4.7 (0-45)                | 195 (25-520)        | 1.7 (0-20)               | 1.2 (0-16)              | 3.5% (0-32%)                       | 1.5 (0-12)       | 0%                                               | 30%                                        |
| Sweet Snacks                       |                            |                         |                      |                       |                          |                           |                     |                          |                         |                                    |                  |                                                  |                                            |
| Middle (n=184)                     | 77%                        | 166 (50-400)            | 4.4 (0-14)           | 5.8 (0-36)            | 1.2 (0-6)                | 6.0 (0-23)                | 133 (0-620)         | 13.3 (2-52)              | 12.2 (0-32)             | 30% (0-74%)                        | 1.9 (0-9)        | 0%                                               | 10%                                        |
| High (n=481)                       | 61%                        | 182 (0-720)             | 5.2 (0-34)           | 6.8 (0-45)            | 1.7 (0-16)               | 8.3 (0-26)                | 125 (25-540)        | 15.8 (0-102)             | 14.7 (0-102)            | 32% (0-96%)                        | 1.7 (0-9)        | 1%                                               | 17%                                        |
| Ice Cream and Frozen Treats        |                            |                         |                      |                       |                          |                           |                     |                          |                         |                                    |                  |                                                  |                                            |
| Middle (n=113)                     | 86%                        | 127 (40-320)            | 2.5 (0-12)           | 2.9 (0-15)            | 1.1 (0-7)                | 5.2 (0-35)                | 61 (0-210)          | 16.7 (6-37)              | 10.1 (0-37)             | 34% (0-82%)                        | 0.2 (0-1)        | 0%                                               | 33%                                        |
| High (n=106)                       | 95%                        | 122 (60-200)            | 2.3 (0-12)           | 3.0 (0-15)            | 1.0 (0-7)                | 5.3 (0-35)                | 59 (0-170)          | 15.5 (11-30)             | 9.4 (0-17)              | 33% (0-68%)                        | 0.2 (0-2)        | 0%                                               | 38%                                        |
| Yogurt and Cheese                  |                            |                         |                      |                       |                          |                           |                     |                          |                         |                                    |                  |                                                  |                                            |
| Middle (n=4)                       | 100%                       | 83 (60-100)             | 0.0 (0-0)            | 0.0 (0-0)             | 0.0 (0-0)                | 0.0 (0-0)                 | 58 (45-70)          | 10.5 (9-12)              | 5.0 (4-6)               | 25% (20-29%)                       | 0.0 (0-0)        | 0%                                               | 0%                                         |
| High (n=6)                         | 83%                        | 140 (80-220)            | 4.5 (0-10)           | 6.0 (0-13)            | 2.2 (0-4)                | 10.7 (0-20)               | 159 (75-319)        | 11.5 (0-23)              | 7.8 (0-17)              | 17% (0-38%)                        | 0.8 (0-3)        | 0%                                               | 0%                                         |
| Fruits and Vegetables <sup>4</sup> |                            |                         |                      |                       |                          |                           |                     |                          |                         |                                    |                  |                                                  |                                            |
| Middle (n=2)                       | 100%                       | 145 (30-260)            | 8.0 (0-16)           | 12.5 (0-25)           | 1.5 (0-3)                | 7.5 (0-15)                | 70 (0-140)          | 10.5 (6-15)              | 0.0 (0-0)               | 0% (0-0)                           | 3.0 (1-5)        | 0%                                               | 0%                                         |
| High (n=6)                         | 100%                       | 125 (30-260)            | 5.3 (0-16)           | 8.3 (0-25)            | 1.0 (0-3)                | 5.0 (0-15)                | 48 (0-140)          | 12.7 (6-16)              | 0.0 (0-0)               | 0% (0-0)                           | 2.8 (1-5)        | 0%                                               | 0%                                         |

\*Regulated by the Smart Snack standards (total sugar is regulated as a percentage of the product weight [ $\leq 35\%$  by weight])

<sup>1</sup> Among n= 72 middle and high schools in a national sample of schools selling competitive foods, which includes the total number of products available across multiple locations within a school.

<sup>2</sup>Non-sugar sweeteners (i.e., artificial sweeteners and other sugar substitutes) are allowed by the Smart Snacks standards within high schools only. Those examined included: aspartame (e.g., NutraSweet and Equal); acesulfame potassium (e.g., Sweet One); saccharin (e.g., Sweet'N Low); sucralose (e.g., Splenda); and stevia.

<sup>3</sup> Synthetic food dyes and other additives are not regulated by the Smart Snacks standards. Those examined included: Blue No. 1; Blue No. 2; Green No. 3; Red No. 3; Red No. 40; Yellow No. 5; Yellow No. 6; titanium dioxide; and tert-butylhydroquinone (TBHQ).

<sup>4</sup> Includes combinations of fruit or vegetables with dips or nut butters (e.g., apples with peanut butter)

<sup>5</sup> 47% of products contained artificial sweeteners in high schools (i.e., excluding the natural sweetener stevia). Stevia was not present in any beverages in middle schools nor in any food products.

**Supplemental Table 3. Differences in Smart Snacks compliance among different competitive food categories by school characteristics<sup>1</sup>**

| Category                    | % Compliance <sup>2</sup> | P-value <sup>3</sup> |
|-----------------------------|---------------------------|----------------------|
| <b>Beverages (n=1,017)</b>  |                           |                      |
| Grade Level                 |                           |                      |
| High                        | 76%                       | Ref*                 |
| Middle                      | 73%                       | 0.6                  |
|                             |                           |                      |
| Urbanicity                  |                           |                      |
| Urban                       | 68%                       | Ref                  |
| Suburban                    | 76%                       | 0.2                  |
| Rural                       | 79%                       | 0.1                  |
|                             |                           |                      |
| FNS Region                  |                           |                      |
| Mid Atlantic                | 52%                       | Ref                  |
| Midwest                     | 76%                       | 0.02                 |
| Mountain Plains             | 77%                       | 0.05                 |
| Northeast                   | 79%                       | 0.02                 |
| Southeast                   | 76%                       | 0.2                  |
| Southwest                   | 87%                       | 0.001                |
| West                        | 74%                       | 0.1                  |
|                             |                           |                      |
| Location                    |                           |                      |
| Inside Cafeteria            | 86%                       | Ref                  |
| School Store                | 62%                       | 0.002                |
| Other Locations             | 75%                       | 0.005                |
|                             |                           |                      |
| Oversees Competitive Foods  |                           |                      |
| Food Service Director       | 80%                       | Ref                  |
| Other <sup>4</sup>          | 69%                       | 0.1                  |
| <b>Salty Snacks (n=905)</b> |                           |                      |
| Grade Level                 |                           |                      |
| High                        | 54%                       | Ref                  |
| Middle                      | 58%                       | 0.4                  |
|                             |                           |                      |
| Urbanicity                  |                           |                      |
| Urban                       | 58%                       | Ref                  |
| Suburban                    | 55%                       | 0.8                  |
| Rural                       | 55%                       | 0.8                  |
|                             |                           |                      |
| FNS Region                  |                           |                      |
| Mid Atlantic                | 43%                       | Ref                  |
| Midwest                     | 52%                       | 0.6                  |
| Mountain Plains             | 64%                       | 0.2                  |
| Northeast                   | 48%                       | 0.7                  |
| Southeast                   | 74%                       | 0.1                  |
| Southwest                   | 68%                       | 0.1                  |
| West                        | 41%                       | 0.9                  |
|                             |                           |                      |
| Location                    |                           |                      |
| Inside Cafeteria            | 87%                       | Ref                  |
| School Store                | 16%                       | <0.0001              |
| Other Locations             | 65%                       | <0.0001              |
|                             |                           |                      |
| Oversees Competitive Foods  |                           |                      |
| Food Service                | 67%                       | Ref                  |

|                              |     |         |
|------------------------------|-----|---------|
| Other                        | 45% | 0.04    |
| Sweet Snacks (n=665)         |     |         |
| Grade Level                  |     |         |
| High                         | 56% | Ref     |
| Middle                       | 63% | 0.2     |
|                              |     |         |
| Urbanicity                   |     |         |
| Urban                        | 60% | Ref     |
| Suburban                     | 59% | 0.9     |
| Rural                        | 60% | 0.9     |
|                              |     |         |
| FNS Region                   |     |         |
| Mid Atlantic                 | 43% | Ref     |
| Midwest                      | 54% | 0.4     |
| Mountain Plains              | 70% | 0.1     |
| Northeast                    | 68% | 0.1     |
| Southeast                    | 80% | 0.06    |
| Southwest                    | 67% | 0.08    |
| West                         | 35% | 0.7     |
|                              |     |         |
| Location                     |     |         |
|                              |     |         |
| Inside Cafeteria             | 84% | Ref     |
| School Store                 | 32% | <0.0001 |
| Other Locations              | 63% | <0.0001 |
|                              |     |         |
| Oversees Vending<br>Machines |     |         |
| Food Service                 | 70% | Ref     |
| Other                        | 49% | 0.04    |

\*Reference category.

<sup>1</sup> Among n= 72 middle and high schools in a national sample of schools selling competitive foods (n=2,824 competitive foods offered across multiple locations within the schools)

<sup>2</sup> % Compliant = number of Smart Snacks compliant competitive foods / total number of competitive foods.

Compliance is estimated using least squares means regression.

<sup>3</sup> Calculated using mixed methods analysis of variance, accounting for repeated measures within schools and clustering within school districts (all covariates simultaneously included in models).

<sup>4</sup> Other includes outside vendors, principal, student organizations, or other organizations.

**Supplemental Table 4. Percent compliance with the Smart Snacks standards by nutrient standard among competitive foods observed in a national sample of middle and high schools<sup>1</sup>**

| All Snacks                | Calories (≤200 kcal)      |                      | Percent of calories from saturated fat (<10%) |         | Sodium (≤200 mg) |         | Total sugar (≤ 35% by weight) |         | Other <sup>2</sup> |         |
|---------------------------|---------------------------|----------------------|-----------------------------------------------|---------|------------------|---------|-------------------------------|---------|--------------------|---------|
|                           | % Compliance <sup>2</sup> | P-value <sup>3</sup> | % Compliance                                  | P-value | % Compliance     | P-value | % Compliance                  | P-value | % Compliance       | P-value |
| Urbanicity                |                           |                      |                                               |         |                  |         |                               |         |                    |         |
| Urban                     | 83%                       | Ref                  | 81%                                           | Ref     | 83%              | Ref     | 87%                           | Ref     | 57%                | Ref     |
| Suburban                  | 84%                       | 0.9                  | 89%                                           | 0.6     | 82%              | 0.8     | 84%                           | 0.3     | 58%                | 0.9     |
| Rural                     | 91%                       | 0.1                  | 84%                                           | 0.1     | 87%              | 0.5     | 81%                           | 0.1     | 61%                | 0.6     |
| FNS Region                |                           |                      |                                               |         |                  |         |                               |         |                    |         |
| Mid Atlantic              | 79%                       | Ref                  | 71%                                           | Ref     | 79%              | Ref     | 85%                           | Ref     | 42%                | Ref     |
| Midwest                   | 84%                       | 0.5                  | 83%                                           | 0.1     | 85%              | 0.5     | 78%                           | 0.2     | 57%                | 0.2     |
| Mountain Plains           | 97%                       | 0.05                 | 87%                                           | 0.06    | 93%              | 0.1     | 84%                           | 0.8     | 67%                | 0.05    |
| Northeast                 | 90%                       | 0.2                  | 85%                                           | 0.07    | 87%              | 0.4     | 87%                           | 0.7     | 58%                | 0.2     |
| Southeast                 | 94%                       | 0.2                  | 97%                                           | 0.01    | 88%              | 0.4     | 88%                           | 0.8     | 77%                | 0.03    |
| Southwest                 | 95%                       | 0.04                 | 86%                                           | 0.03    | 94%              | 0.05    | 85%                           | 0.9     | 70%                | 0.01    |
| West                      | 64%                       | 0.1                  | 84%                                           | 0.1     | 64%              | 0.1     | 80%                           | 0.4     | 41%                | 0.9     |
| Location                  |                           |                      |                                               |         |                  |         |                               |         |                    |         |
| Inside Cafeteria          | 87%                       | Ref                  | 95%                                           | Ref     | 92%              | Ref     | 99%                           | Ref     | 85%                | Ref     |
| School Store              | 87%                       | 0.2                  | 83%                                           | 0.0001  | 82%              | 0.04    | 65%                           | <0.0001 | 30%                | <0.0001 |
| Other Locations           | 76%                       | <0.0001              | 76%                                           | <0.0001 | 79%              | <0.0001 | 88%                           | <0.0001 | 62%                | <0.0001 |
| Oversees Vending Machines |                           |                      |                                               |         |                  |         |                               |         |                    |         |
| Food Service              | 93%                       | Ref                  | 91%                                           | Ref     | 90%              | Ref     | 85%                           | Ref     | 69%                | Ref     |
| Other                     | 79%                       | 0.03                 | 79%                                           | 0.02    | 79%              | 0.04    | 83%                           | 0.7     | 49%                | 0.01    |
| Type of Snack             |                           |                      |                                               |         |                  |         |                               |         |                    |         |
| Salty snacks (n=905)      |                           |                      |                                               |         |                  |         |                               |         |                    |         |
| Urbanicity                |                           |                      |                                               |         |                  |         |                               |         |                    |         |
| Urban                     | 80%                       | Ref                  | 83%                                           | Ref     | 73%              | Ref     | 100%                          | Ref     | 58%                | Ref     |
| Suburban                  | 86%                       | 0.3                  | 84%                                           | 0.8     | 73%              | 0.9     | 100%                          | 0.9     | 55%                | 0.8     |
| Rural                     | 92%                       | 0.06                 | 86%                                           | 0.5     | 77%              | 0.6     | 99%                           | 0.6     | 55%                | 0.8     |
| FNS Region                |                           |                      |                                               |         |                  |         |                               |         |                    |         |
| Mid Atlantic              | 73%                       | Ref                  | 73%                                           | Ref     | 63%              | Ref     | 100%                          | Ref     | 43%                | Ref     |
| Midwest                   | 89%                       | 0.08                 | 81%                                           | 0.3     | 75%              | 0.3     | 99%                           | 0.8     | 52%                | 0.6     |
| Mountain Plains           | 94%                       | 0.04                 | 85%                                           | 0.2     | 87%              | 0.04    | 99%                           | 0.7     | 64%                | 0.2     |
| Northeast                 | 85%                       | 0.2                  | 79%                                           | 0.5     | 75%              | 0.2     | 100%                          | 0.9     | 48%                | 0.7     |

|                           |     |         |     |         |     |         |      |         |     |         |
|---------------------------|-----|---------|-----|---------|-----|---------|------|---------|-----|---------|
| Southeast                 | 96% | 0.07    | 94% | 0.06    | 82% | 0.2     | 100% | 0.9     | 74% | 0.1     |
| Southwest                 | 89% | 0.06    | 86% | 0.08    | 83% | 0.04    | 100% | 0.9     | 68% | 0.1     |
| West                      | 80% | 0.5     | 93% | 0.03    | 55% | 0.5     | 100% | 0.9     | 41% | 0.9     |
| Location                  |     |         |     |         |     |         |      |         |     |         |
| Inside Cafeteria          | 99% | Ref     | 97% | Ref     | 96% | Ref     | 100% | Ref     | 87% | Ref     |
| School Store              | 82% | 0.006   | 68% | <0.0001 | 57% | <0.0001 | 100% | 0.9     | 16% | <0.0001 |
| Other Locations           | 77% | <0.0001 | 88% | 0.003   | 70% | <0.0001 | 99%  | 0.8     | 65% | <0.0001 |
| Oversees Vending Machines |     |         |     |         |     |         |      |         |     |         |
| Food Service              | 96% | Ref     | 90% | Ref     | 83% | Ref     | 100% | Ref     | 67% | Ref     |
| Other                     | 77% | 0.003   | 79% | 0.07    | 65% | 0.01    | 99%  | 0.7     | 45% | 0.04    |
| Sweet snacks (n=665)      |     |         |     |         |     |         |      |         |     |         |
| Urbanicity                |     |         |     |         |     |         |      |         |     |         |
| Urban                     | 85% | Ref     | 85% | Ref     | 92% | Ref     | 69%  | Ref     | 60% | Ref     |
| Suburban                  | 80% | 0.5     | 85% | 0.9     | 94% | 0.8     | 56%  | 0.03    | 59% | 0.9     |
| Rural                     | 89% | 0.6     | 91% | 0.3     | 96% | 0.6     | 56%  | 0.07    | 60% | 0.9     |
| FNS Region                |     |         |     |         |     |         |      |         |     |         |
| Mid Atlantic              | 83% | Ref     | 72% | Ref     | 97% | Ref     | 62%  | Ref     | 42% | Ref     |
| Midwest                   | 79% | 0.7     | 84% | 0.3     | 91% | 0.5     | 48%  | 0.2     | 54% | 0.4     |
| Mountain Plains           | 99% | 0.3     | 94% | 0.08    | 96% | 0.9     | 68%  | 0.6     | 70% | 0.1     |
| Northeast                 | 91% | 0.6     | 95% | 0.08    | 93% | 0.7     | 67%  | 0.7     | 68% | 0.1     |
| Southeast                 | 97% | 0.4     | 99% | 0.03    | 99% | 0.6     | 64%  | 0.9     | 80% | 0.06    |
| Southwest                 | 99% | 0.2     | 85% | 0.2     | 99% | 0.3     | 67%  | 0.7     | 67% | 0.08    |
| West                      | 47% | 0.01    | 76% | 0.8     | 71% | 0.03    | 48%  | 0.3     | 35% | 0.7     |
| Location                  |     |         |     |         |     |         |      |         |     |         |
| Inside Cafeteria          | 90% | Ref     | 98% | Ref     | 86% | Ref     | 96%  | Ref     | 84% | Ref     |
| School Store              | 91% | 0.9     | 84% | 0.08    | 99% | 0.0006  | 16%  | <0.0001 | 32% | <.0001  |
| Other Locations           | 74% | 0.0001  | 79% | <0.0001 | 85% | 0.7     | 69%  | <0.0001 | 63% | <.0001  |
| Oversees Vending Machines |     |         |     |         |     |         |      |         |     |         |
| Food Service              | 88% | Ref     | 98% | Ref     | 95% | Ref     | 60%  | Ref     | 70% | Ref     |
| Other                     | 82% | 0.05    | 76% | 0.007   | 93% | 0.8     | 61%  | 0.9     | 49% | 0.04    |

\*Includes products with artificial sweeteners that are only compliant in high schools.

<sup>1</sup> Among n= 72 middle and high schools in a national sample of schools selling competitive foods.

<sup>2</sup> "Other" includes: (1) a grain product that contains 50 percent or more whole grains by weight (have a whole grain as the first ingredient); (2) a product with the first ingredient being a fruit, a vegetable, a dairy food, or a protein food; or (3) a combination food that contains at least ¼ cup of fruit and/or vegetable



<sup>3</sup> Milk includes unflavored or flavored fat-free milk, low-fat milk, and milk alternatives as permitted by the National School Lunch Program /School Breakfast program. Compliance for milk products is  $\leq$  12 fluid ounces.

<sup>4</sup> Compliance for 100% fruit juice is  $\leq$  12 fluid ounces.

<sup>5</sup> Low and no-calorie beverages (high school only) include low calorie drinks with the equivalent of 5 calories per fluid ounce (maximum of 60 kcals/12 fl oz) and no-calorie beverages with less than 5 calories per 8 fluid ounces (maximum of 10 calories/20 fl oz).

<sup>6</sup> Includes combinations of fruit or vegetables with dips or nut butters (e.g., apples with peanut butter)
